# Supplementary material
Source: bioRxiv or medRxiv preprint supplement (https://www.biorxiv.org/content/biorxiv/early/2021/08/02/2021.07.15.452420/DC1/embed/media-1.pdf)
Supplement: Supplementary file [file media-1.pdf]

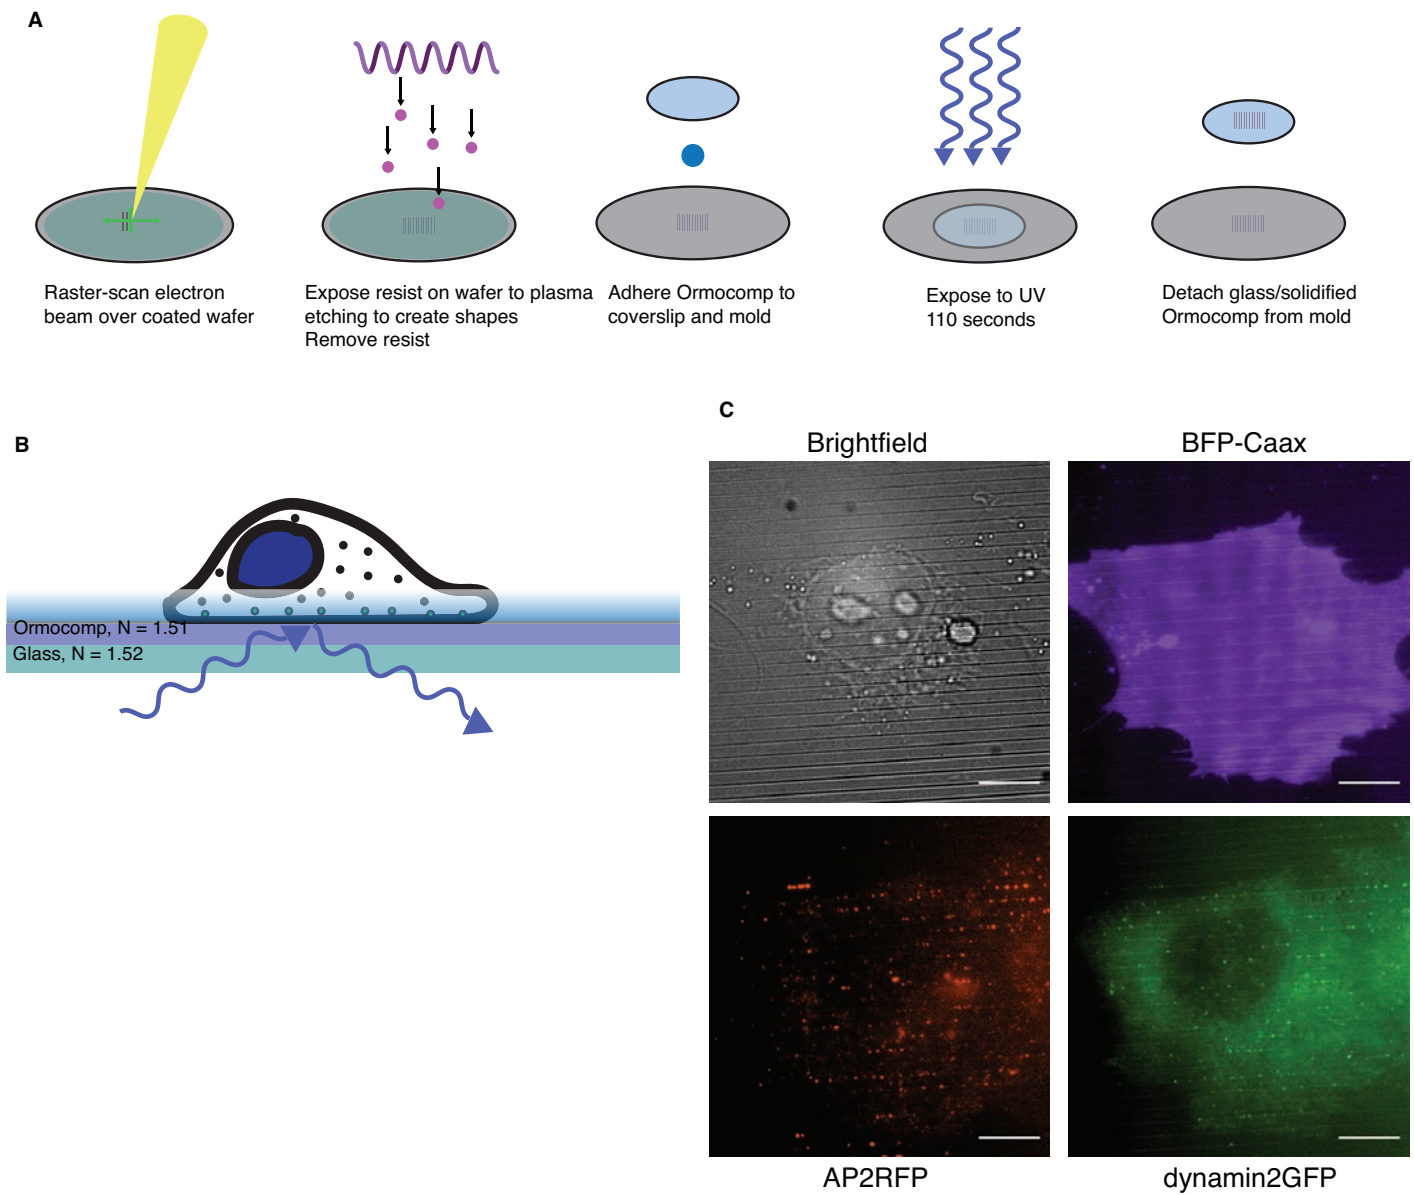

**Fig. S1. UV-Nanoimprint Lithography creates glass-like substrates for induced curvature studies. (A)** Method of silicon mold production and Ormocomp substrate manufacturing. **(B)** Ormocomp's refractive index allows for TIRF microscopy of live cells. **(C)** TIRF microscopy of a cell grown on 120-nanometer ridges expressing BFP-Caax, AP2RFP, and dynamain2GFP simultaneously.

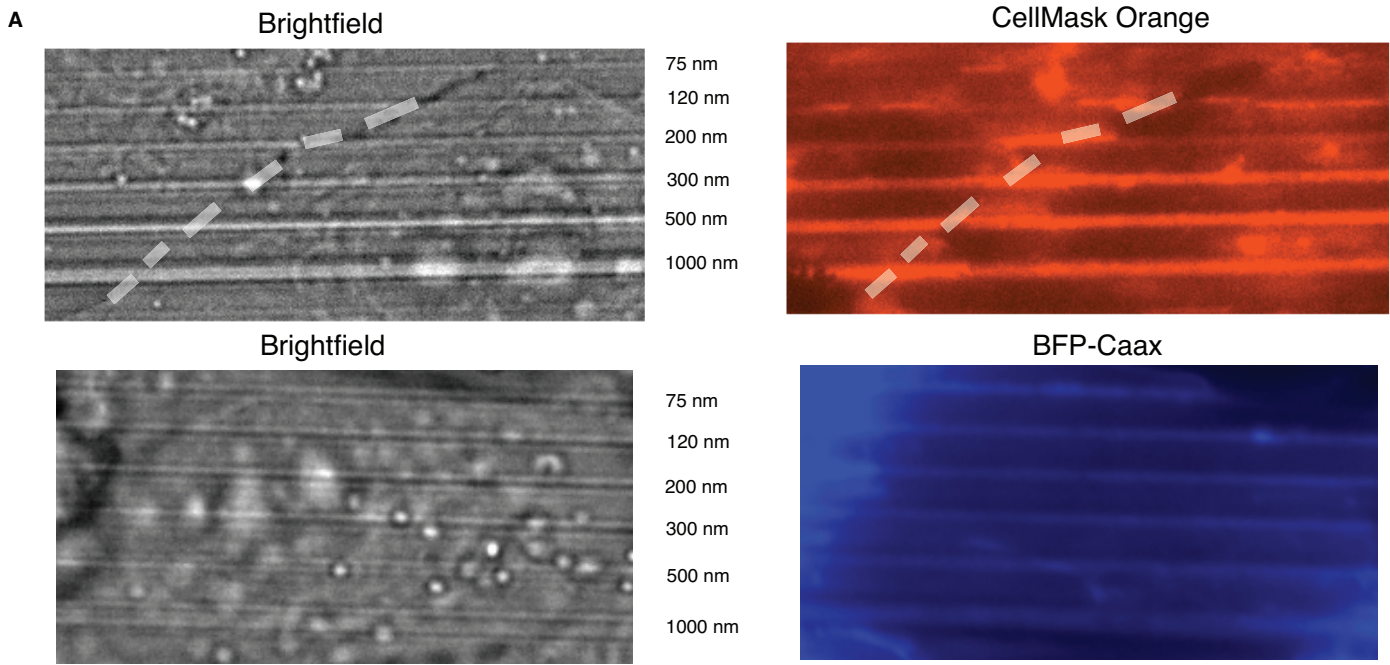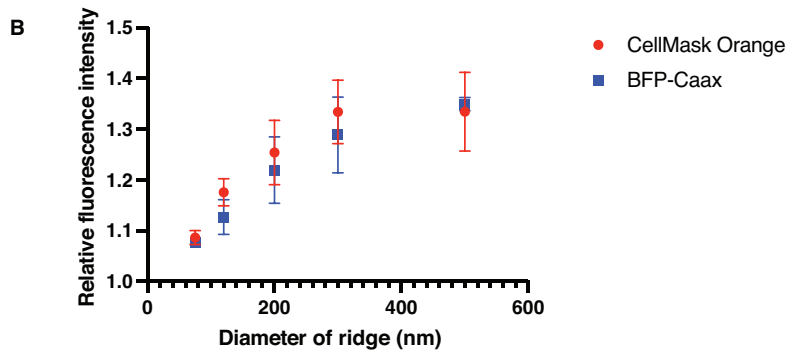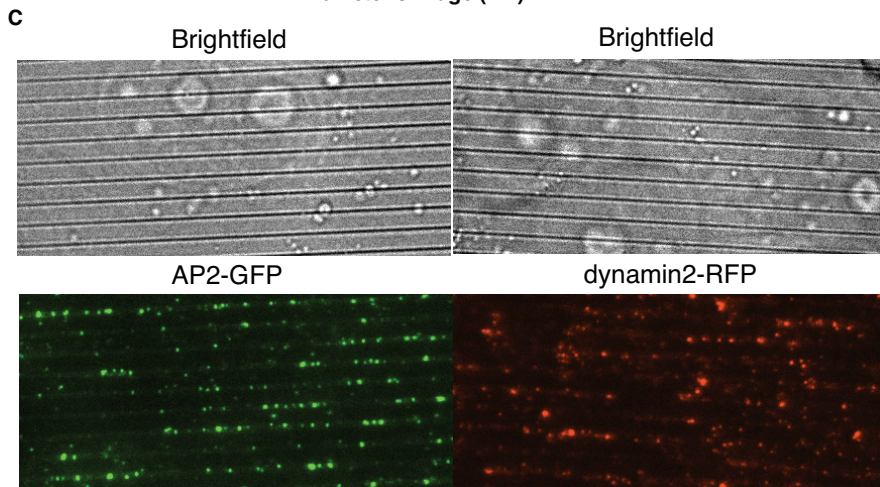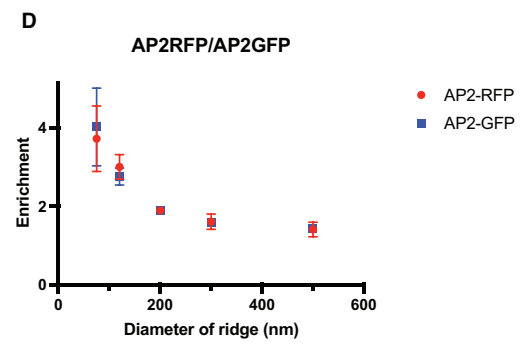

**Fig. S2. Membrane enrichment on nanoridges increases with ridge size.** (A) Representative TIRF microscopy images of live cells on variable-size nanoridges with CellMask Orange (top) or BFP-Caax (bottom), with gray dashed line indicating interface between two cells. (B) Fluorescence intensity increase of CellMask Orange and BFP-Caax over flat substrate (Mean  $\pm$  SEM,  $n = 10$  cells for CellMask Orange, 4 cells for BFP-Caax). (C) AP2GFP and DNM2RFP puncta, visualized by TIRF microscopy, demonstrating that they respond to induced curvature. (D) Comparison of enrichment score for AP2RFP and AP2GFP (Mean  $\pm$  SD).

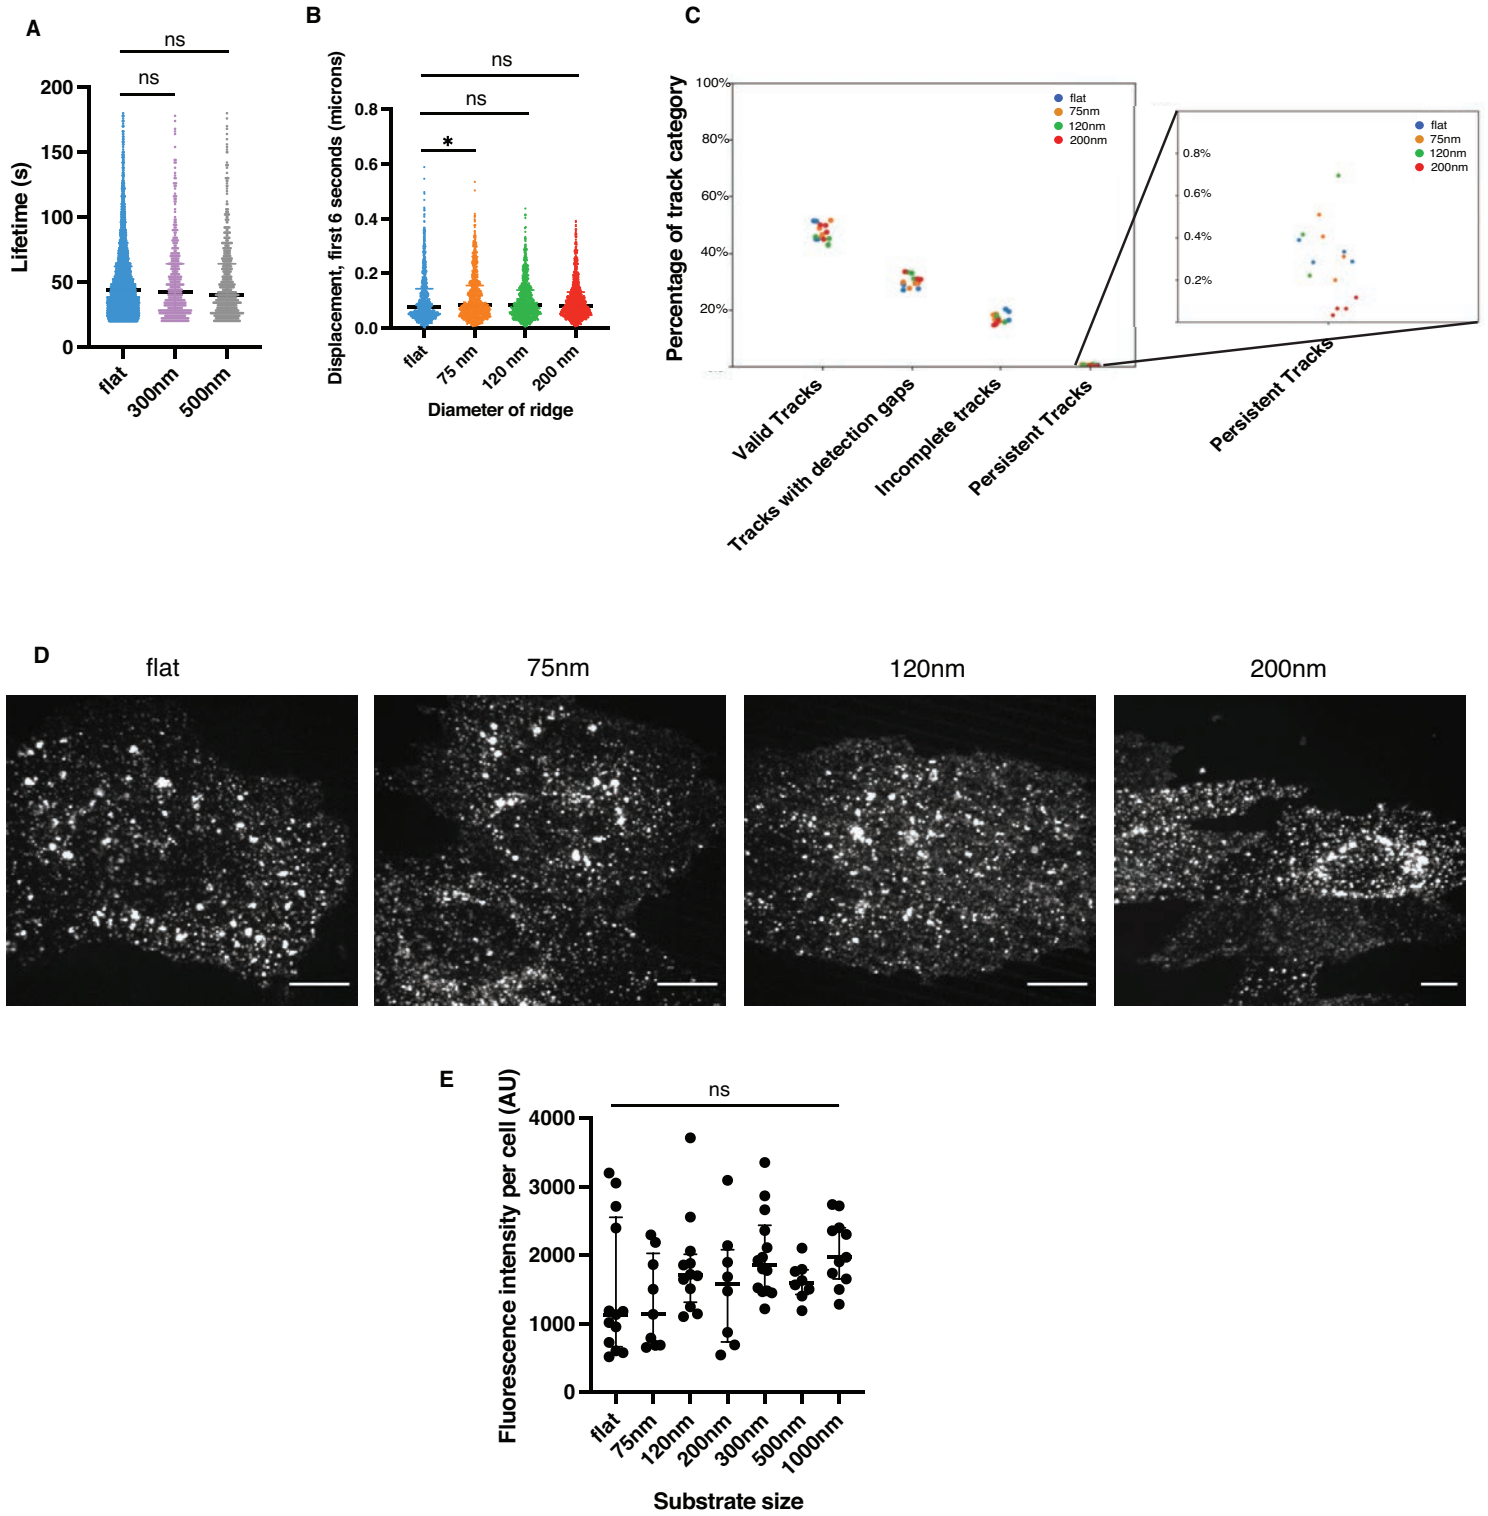

**Fig. S3. Substrate diameter does not affect percentage of bona fide endocytic sites or uptake of fluorescent transferrin.** (A) Lifetime of bona fide CCPs from flat, 300nm, and 500nm substrates (Mean  $\pm$  interquartile range,  $n > 800$  tracks per condition, from 3-4 cells per condition,  $P$  Student's  $t$  test). (B) Displacement in the first 6 seconds of detection for CCPs from flat, 75nm, 120nm, and 200nm substrates (Mean  $\pm$  interquartile range,  $U$  Mann-Whitney test). (C) Left: Percentage of each class of classified CCP from 3-4 cells grown on each size of substrate. Right: Zoom view of percentage of persistent tracks. (D) Representative maximum intensity projection images of fixed cells, imaged by confocal microscopy, with AlexaFluor-647 tagged transferrin taken up by cells on different size nanoridges. (E) Quantification of (D) (Mean  $\pm$  SD,  $P$  two-way ANOVA).

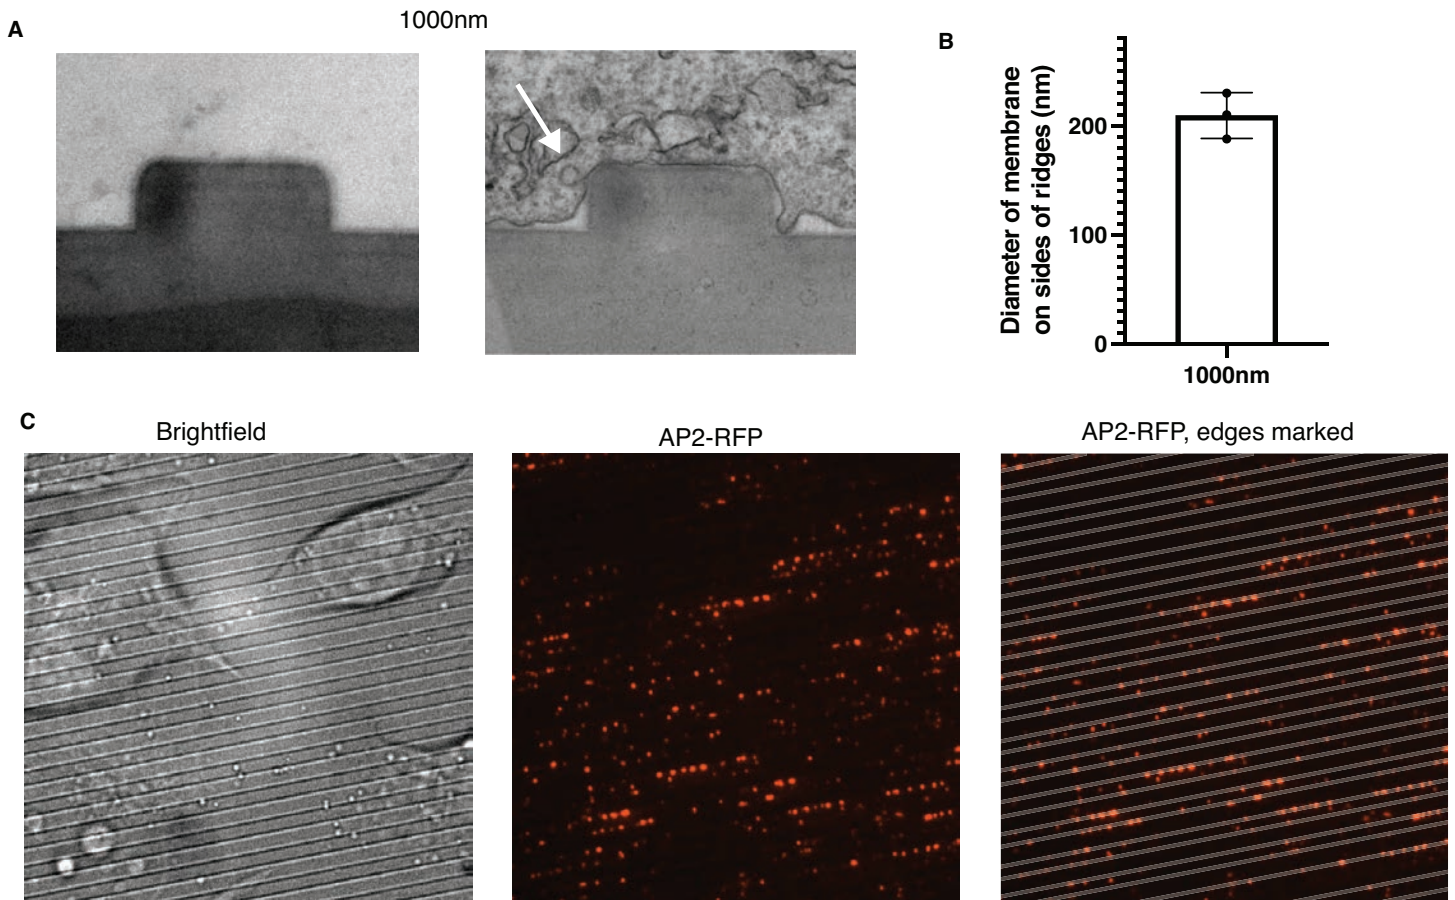

**Fig. S4. 1000-nanometer ridges induce curvature on the side, but not the top, of the ridge.**

(A) Representative TEM images of the 1000-nanometer ridge (left) and a cell grown on the ridge (right). (B) Average diameter of the induced curvature on the edge of the 1000-nm ridge (Mean  $\pm$  SD). (C) Representative TIRF microscopy images of live cells grown on 1000-nanometer ridge with AP2-RFP localizing to the edges of the ridge.

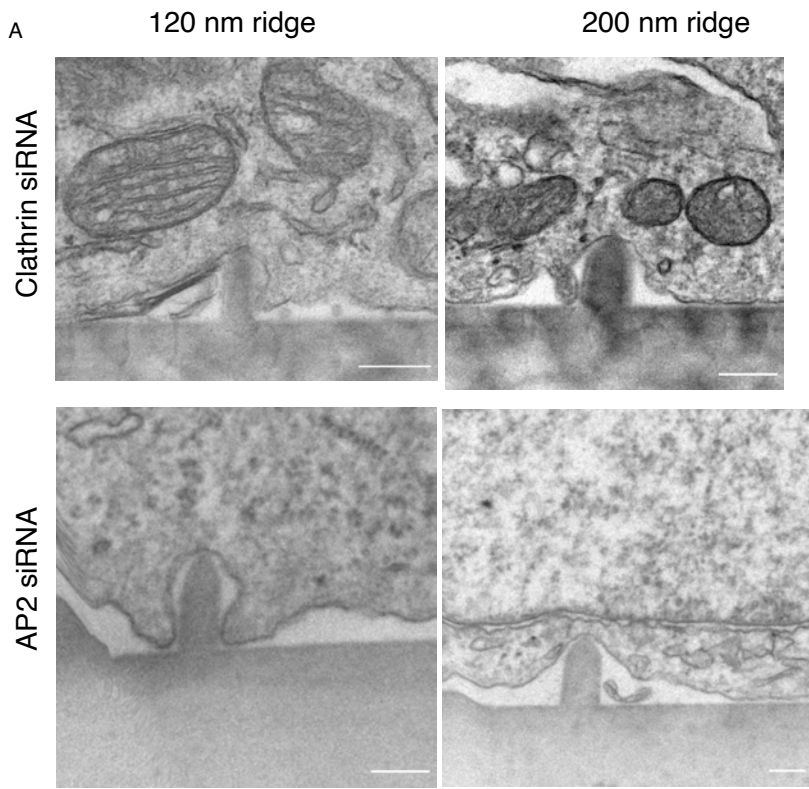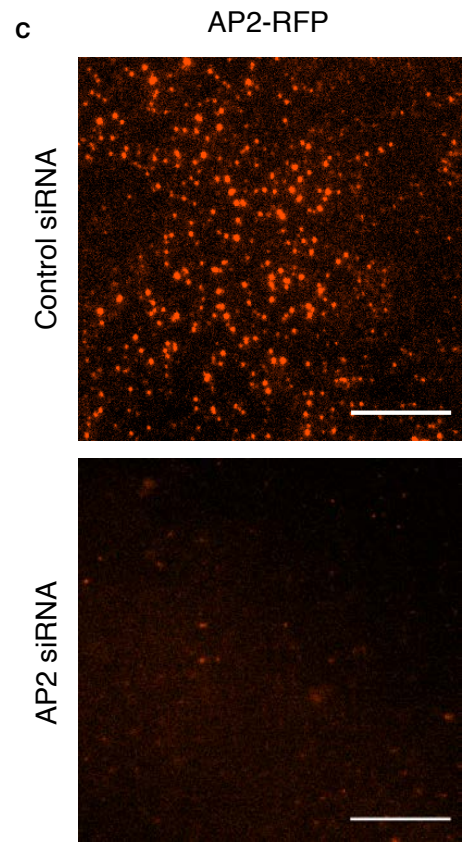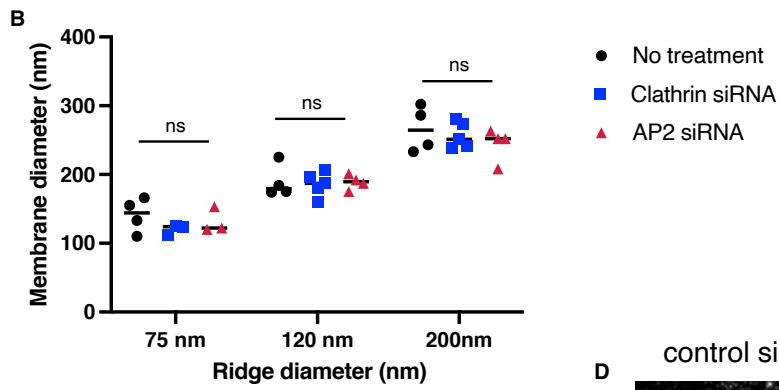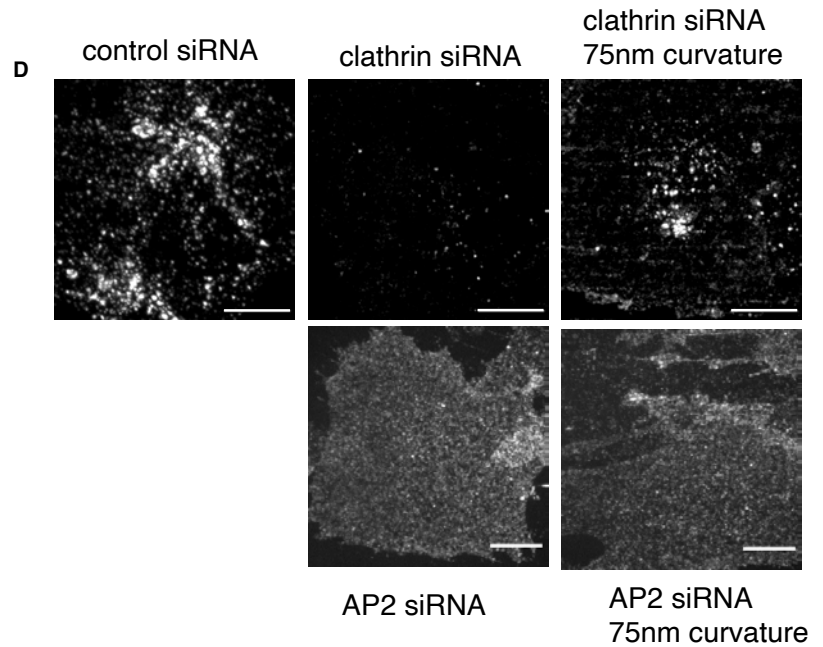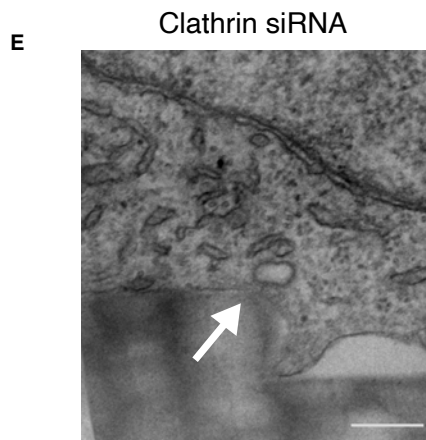

**Fig. S5. Clathrin/AP2 knockdown do not affect membrane wrapping on substrates. (A)**

Representative TEM images of clathrin (top) and AP2 (bottom) siRNA-treated cells. **(B)**

Quantification of membrane diameter in **(A)** (Mean  $\pm$  SD, *P* Student's t test). **(C)** AP2 siRNA

significantly reduces the number of puncta of AP2RFP visible by TIRF microscopy. **(D)**

Maximum intensity projections of fluorescent transferrin uptake assay from cells treated with

siRNAs to clathrin (top) or AP2 (bottom) and exposed to flat or 75-nm substrates, imaged by

confocal microscopy. **(E)** An electron-clear, membrane-enclosed but clathrin-negative structure

visible in thin-section TEM of clathrin knockdown cells with induced curvature. **(F)**

Quantification of fluorescence intensity per cell of AP2 siRNA-treated cells with or without

induced curvature (Mean  $\pm$  SD, *P* Student's t test)
